# Supplementary material
Source: Springer Nature journal article supplement (https://www.springermedizin.de/resource/supplementary/12913_2013_2705_MOESM3_ESM.pdf/9531220)
Supplement: MOESM3 [file 9531220]

**Phase 1: Survey involving telephone interviews with the Principal Investigator in each of the 12 British children's kidney units to determine the range of disciplines in each MDT and individuals' parent-educative functions**

**Phase 2: Qualitative focus group or individual interviews with a convenience sample of 112 MDT professionals from the 12 units to obtain detailed, retrospective accounts of their parent-educative activity**

**Phase 3: Focused observations and qualitative explorations of learning interactions involving six families & 28 MDT professionals in two units**
